# Supplementary material
Source: PubMed Central journal article supplement (PMC9015518)
Supplement: JTS-35-559-s001.pdf [file JTS-35-559-s001.pdf]

Rapid Assessment of COVID-19-Related Experiences (RACE)  
 Erika J. Wolf & Dana Fein-Schaffer  
 National Center for PTSD at VA Boston Healthcare System  
 2020

**The following questions ask about changes in your mental health symptoms as a result of the COVID-19 pandemic and your experience of COVID-19 symptoms. For each question, circle the response that is most true for you.**

|                                                                                                                           |              |                                                         |                                                  |                                                                           |                  |          |                      |
|---------------------------------------------------------------------------------------------------------------------------|--------------|---------------------------------------------------------|--------------------------------------------------|---------------------------------------------------------------------------|------------------|----------|----------------------|
| <b>1. Were you able to practice social distancing starting around Mid-March 2020?</b>                                     | (0) No       | (1) Yes                                                 |                                                  |                                                                           |                  |          |                      |
| <b>2. On average, how often did you go out during the time that staying at home was recommended by local authorities?</b> | (1) Never    | (2) 1-2 times per week                                  | (3) 3-4 times per week                           | (4) Daily or nearly every day                                             |                  |          |                      |
| <b>2b. Why did you have to leave your home? (check all that apply):</b>                                                   | (1) For work | (2) Groceries and/or medicine and other essential goods | (3) Medical appointments for yourself or others  | (4) To check on the wellness of family or friends or to take care of them | (5) To socialize |          |                      |
| <b>3. Who was in the home with you during the time that social distancing was recommended? (check all that apply):</b>    | (1) No one   | (2) My spouse or significant other                      | (3) Adult children or other adult family members | (4) Children under 18                                                     | (5) Friends      | (6) Pets | (7) Other (fill in): |

|                                                                                                                        |                                                                                                                               |                                                                                                                                  |                                                                                                                            |                                                                                                                                |                                                                                                                              |  |  |
|------------------------------------------------------------------------------------------------------------------------|-------------------------------------------------------------------------------------------------------------------------------|----------------------------------------------------------------------------------------------------------------------------------|----------------------------------------------------------------------------------------------------------------------------|--------------------------------------------------------------------------------------------------------------------------------|------------------------------------------------------------------------------------------------------------------------------|--|--|
| <b>4. To what extent has the COVID-19 pandemic affected you financially?</b>                                           | (1) It is posing an extreme financial hardship for me (e.g., I have lost most of my income, savings, or financial assistance) | (2) It is posing somewhat of a financial hardship for me (e.g., I have lost some of my income, savings, or financial assistance) | (3) It has not affected my financial situation (e.g., no meaningful change in my income, savings, or financial assistance) | (4) My financial situation is a little bit improved (e.g., my income, savings, or financial assistance has increased a little) | (5) My financial situation is substantially improved (e.g., my income, savings, or financial assistance has increased a lot) |  |  |
| <b>5. To what extent has the COVID-19 pandemic affected your housing situation?</b>                                    | (1) I have lost my housing                                                                                                    | (2) I am at risk of losing my housing (e.g., I cannot afford my rent or mortgage or due to closure of shelter or shared home)    | (3) It has not affected my housing                                                                                         | (4) My housing situation is improved (e.g., I was able to get into a new, safer, or better housing situation)                  |                                                                                                                              |  |  |
| <b>6. During the height of the coronavirus pandemic, to what extent were you concerned about contracting COVID-19?</b> | (1) I was not at all concerned about contracting COVID-19                                                                     | (2) I was a little concerned about contracting COVID-19                                                                          | (3) I was moderately concerned about contracting COVID-19                                                                  | (4) I was very concerned about contracting COVID-19                                                                            | (5) I was extremely concerned about contracting COVID-19                                                                     |  |  |

**These next questions are all concerned with how you have been feeling in the past two weeks compared to what is typical or usual for you:**

|                                                                                                                                              |                                                 |                                                    |                                                           |                                                    |                                                 |  |  |
|----------------------------------------------------------------------------------------------------------------------------------------------|-------------------------------------------------|----------------------------------------------------|-----------------------------------------------------------|----------------------------------------------------|-------------------------------------------------|--|--|
| <b>7. In the past two weeks, to what extent has the COVID-19 pandemic affected your feelings of anxiety compared to usual?</b>               | (1) I am a lot less anxious than usual          | (2) I am a little less anxious than usual          | (3) There has been no change in my anxiety                | (4) I am a little more anxious than usual          | (5) I am a lot more anxious than usual          |  |  |
| <b>8. In the past two weeks, to what extent has the COVID-19 pandemic affected your feelings of sadness or depression compared to usual?</b> | (1) I am a lot less depressed than usual        | (2) I am a little less depressed than usual        | (3) There has been no change in my depression             | (4) I am a little more depressed than usual        | (5) I am a lot more depressed than usual        |  |  |
| <b>9. In the past two weeks, to what extent has the COVID-19 pandemic affected your feelings of loneliness compared to usual?</b>            | (1) I am a lot less lonely than usual           | (2) I am a little less lonely than usual           | (3) There has been no change in my feelings of loneliness | (4) I am a little more lonely than usual           | (5) I am a lot more lonely than usual           |  |  |
| <b>10. In the past two weeks, to what extent has the COVID-19 pandemic affected your alcohol use compared to usual?</b>                      | (1) I am drinking a lot less alcohol than usual | (2) I am drinking a little less alcohol than usual | (3) There has been no change in my use of alcohol         | (4) I am drinking a little more alcohol than usual | (5) I am drinking a lot more alcohol than usual |  |  |

|                                                                                                                                                                                                                                |                                                                    |                                                                        |                                                                                                                       |                                                                         |                                                                     |  |  |
|--------------------------------------------------------------------------------------------------------------------------------------------------------------------------------------------------------------------------------|--------------------------------------------------------------------|------------------------------------------------------------------------|-----------------------------------------------------------------------------------------------------------------------|-------------------------------------------------------------------------|---------------------------------------------------------------------|--|--|
| <p><b>11. In the past two weeks, to what extent has the COVID-19 pandemic affected your use of marijuana or illicit substances (e.g., drugs, including prescription drugs *not* prescribed for you) compared to usual?</b></p> | <p>(1) I am using a lot less than usual</p>                        | <p>(2) I am using a little less than usual</p>                         | <p>(3) There has been no change in my use of marijuana, illicit substances, or prescriptions not prescribed to me</p> | <p>(4) I am using a little more than usual</p>                          | <p>(5) I am using a lot more than usual</p>                         |  |  |
| <p><b>12. In the past two weeks, to what extent has the COVID-19 pandemic affected your use of prescription drugs (that are prescribed to you) compared to usual?</b></p>                                                      | <p>(1) I am taking fewer prescription drugs than usual</p>         | <p>(2) There has been no change in my use of prescription drugs</p>    | <p>(3) I am taking more prescription drugs than usual, but I am still taking them as prescribed</p>                   | <p>(4) I am taking more of my prescription drugs than is prescribed</p> |                                                                     |  |  |
| <p><b>13. In the past two weeks, to what extent has the COVID-19 pandemic affected your nightmares about past trauma?</b></p>                                                                                                  | <p>(1) I am much less bothered by trauma nightmares than usual</p> | <p>(2) I am a little less bothered by trauma nightmares than usual</p> | <p>(3) There has been no change in how much my trauma nightmares bother me compared to usual</p>                      | <p>(4) I am a little more bothered by trauma nightmares than usual</p>  | <p>(5) I am a lot more bothered by trauma nightmares than usual</p> |  |  |

|                                                                                                                                                                              |                                                                                                        |                                                                                                            |                                                                                                                             |                                                                                                            |                                                                                                        |  |  |
|------------------------------------------------------------------------------------------------------------------------------------------------------------------------------|--------------------------------------------------------------------------------------------------------|------------------------------------------------------------------------------------------------------------|-----------------------------------------------------------------------------------------------------------------------------|------------------------------------------------------------------------------------------------------------|--------------------------------------------------------------------------------------------------------|--|--|
| <p><b>14. In the past two weeks, to what extent has the COVID-19 pandemic affected your unwanted thoughts or memories about past trauma?</b></p>                             | <p>(1) I am much less bothered by unwanted trauma thoughts and memories than usual</p>                 | <p>(2) I am a little less bothered by unwanted trauma thoughts and memories than usual</p>                 | <p>(3) I am a little less bothered by unwanted trauma thoughts and memories than usual</p>                                  | <p>(4) I am a little more bothered by unwanted trauma thoughts and memories than usual</p>                 | <p>(5) I am a lot more bothered by unwanted trauma thoughts and memories than usual</p>                |  |  |
| <p><b>15. In the past two weeks, to what extent has the COVID-19 pandemic affected your efforts to avoid unwanted thoughts, memories, or emotions about past trauma?</b></p> | <p>(1) I am avoiding thoughts, memories, or emotions about past trauma much less compared to usual</p> | <p>(2) I am avoiding thoughts, memories, or emotions about past trauma a little less compared to usual</p> | <p>(3) There has been no change in how much I avoid thoughts, memories, or emotions about past trauma compared to usual</p> | <p>(4) I am avoiding thoughts, memories, or emotions about past trauma a little more compared to usual</p> | <p>(5) I am avoiding thoughts, memories, or emotions about past trauma much more compared to usual</p> |  |  |
| <p><b>16. In the past two weeks, to what extent has the COVID-19 pandemic affected your ability to experience positive emotions, like love or happiness?</b></p>             | <p>(1) I am much more able to experience positive emotions than usual</p>                              | <p>(2) I am a little more able to experience positive emotions than usual</p>                              | <p>(3) There has been no change in my experience of positive emotions compared to usual</p>                                 | <p>(4) I am a little less able to experience positive emotions than usual</p>                              | <p>(5) I am much less able to experience positive emotions than usual</p>                              |  |  |

|                                                                                                                                                                                                                   |                                                                                           |                                                                                               |                                                                                                         |                                                                                               |                                                                                            |  |  |
|-------------------------------------------------------------------------------------------------------------------------------------------------------------------------------------------------------------------|-------------------------------------------------------------------------------------------|-----------------------------------------------------------------------------------------------|---------------------------------------------------------------------------------------------------------|-----------------------------------------------------------------------------------------------|--------------------------------------------------------------------------------------------|--|--|
| <p><b>17. In the past two weeks, to what extent has the COVID-19 pandemic affected your experience of unpleasant emotions and mood (such as pervasive feelings of anger, fear, grief, sadness, or horror)</b></p> | <p>(1) I am much less bothered by pervasive negative moods than usual</p>                 | <p>(2) I am a little less bothered by pervasive negative moods than usual</p>                 | <p>(3) There has been no change in my negative moods compared to usual</p>                              | <p>(4) I am a little more bothered by pervasive negative moods than usual</p>                 | <p>(5) I am a lot more bothered by pervasive negative moods than usual</p>                 |  |  |
| <p><b>18. In the past two weeks, to what extent has the COVID-19 pandemic affected your feelings of being on guard or hypervigilant?</b></p>                                                                      | <p>(1) I am much less bothered by feeling on guard or hypervigilant compared to usual</p> | <p>(2) I am a little less bothered by feeling on guard or hypervigilant compared to usual</p> | <p>(3) There has been no change in my feelings of being on guard or hypervigilant compared to usual</p> | <p>(4) I am a little more bothered by feeling on guard or hypervigilant compared to usual</p> | <p>(5) I am a lot more bothered by feeling on guard or hypervigilant compared to usual</p> |  |  |
| <p><b>19. In the past two weeks, to what extent has the COVID-19 pandemic affected your startle reaction (for example, startling or feeling jumpy in response to a noise)?</b></p>                                | <p>(1) I am much less bothered by startle reactions compared to usual</p>                 | <p>(2) I am a little less bothered by startle reactions compared to usual</p>                 | <p>(3) There has been no change in my startle reactions compared to usual</p>                           | <p>(4) I am a little more bothered by startle reactions compared to usual</p>                 | <p>(5) I am a lot more bothered by startle reactions compared to usual</p>                 |  |  |

|                                                                                                                        |                                        |                                            |                                                            |                                           |                                       |  |  |
|------------------------------------------------------------------------------------------------------------------------|----------------------------------------|--------------------------------------------|------------------------------------------------------------|-------------------------------------------|---------------------------------------|--|--|
| <b>20. In the past two weeks, to what extent has the COVID-19 pandemic affected your sleep?</b>                        | (1) My sleep is much better than usual | (2) My sleep is a little better than usual | (3) There has been no change in my sleep compared to usual | (4) My sleep is a little worse than usual | (5) My sleep is much worse than usual |  |  |
| <b>21. Have you been diagnosed with COVID-19 by a healthcare professional?</b>                                         | (0) No                                 | (1) Yes                                    |                                                            |                                           |                                       |  |  |
| <b>22. Are you concerned that you have or had symptoms of COVID-19 but have not been tested?</b>                       | (0) No                                 | (1) Yes                                    |                                                            |                                           |                                       |  |  |
| <b>If 21 or 22 is answered yes:</b>                                                                                    |                                        |                                            |                                                            |                                           |                                       |  |  |
| <b>22a. Were you hospitalized for your symptoms of COVID-19?</b>                                                       | (0) No                                 | (1) Yes                                    | If yes: For how many days?                                 |                                           |                                       |  |  |
| <b>22b. Did you require intubation or a ventilator for your symptoms of COVID-19?</b>                                  | (0) No                                 | (1) Yes                                    |                                                            |                                           |                                       |  |  |
| <b>22c. Were you quarantined in your home (e.g., under direct order of a board of health or health care provider)?</b> | (0) No                                 | (1) Yes                                    |                                                            |                                           |                                       |  |  |

|                                                                                                                                   |        |         |                            |  |  |  |  |
|-----------------------------------------------------------------------------------------------------------------------------------|--------|---------|----------------------------|--|--|--|--|
| <b>23. Has a close family member or friend been diagnosed with COVID-19?</b>                                                      | (0) No | (1) Yes |                            |  |  |  |  |
| <b>24. Has a close family member or friend had symptoms that they think may be due to COVID-19 but they have not been tested?</b> | (0) No | (1) Yes |                            |  |  |  |  |
| <b>If 23 or 24 is answered yes:</b>                                                                                               |        |         |                            |  |  |  |  |
| <b>24a. Was your friend or family member hospitalized for symptoms of COVID-19?</b>                                               | (0) No | (1) Yes | If yes: For how many days? |  |  |  |  |
| <b>24b. Did your friend or family member require intubation or ventilation for symptoms of COVID-19?</b>                          | (0) No | (1) Yes |                            |  |  |  |  |



|                                                                                                                                   |                                      |                                               |                                                        |                                               |                                           |  |  |
|-----------------------------------------------------------------------------------------------------------------------------------|--------------------------------------|-----------------------------------------------|--------------------------------------------------------|-----------------------------------------------|-------------------------------------------|--|--|
| <b>24c. Was your friend or family member quarantined (e.g., under direct order of a board of health or health care provider)?</b> | (0) No                               | (1) Yes                                       |                                                        |                                               |                                           |  |  |
| <b>25. Has a close family member or friend died from COVID-19?</b>                                                                | (0) No                               | (1) Yes                                       |                                                        |                                               |                                           |  |  |
| <b>26. In the past two weeks, to what extent has the COVID-19 pandemic affected your sense of personal resilience?</b>            | (1) I feel more resilient than usual | (2) I feel a little more resilient than usual | (3) There has been no change in my sense of resilience | (4) I feel a little less resilient than usual | (5) I feel much less resilient than usual |  |  |

**Note:**

Higher symptom and resilience response scores indicate more pathological outcomes, while higher housing/financial stability scores indicate greater stability.

**Scoring Instructions:**

There are five subscales, which are scored as follows:

- (1) Housing/financial stability: sum items 4 and 5
- (2) Mood/anxiety symptoms: sum items 7, 8, and 9
- (3) Substance use: sum items 10, 11, and 12
- (4) PTSD symptoms: sum items 13, 14, 15, 16, 17, 18, 19, and 20
- (5) COVID-19 exposure: sum items 21 and 22 for personal exposure score and sum items 23, 24, and 25 for proximal exposure score
